# Supplementary material for: Water usage of old growth oak at elevated CO 2 in the FACE of climate change
Source: Copernicus journal article supplement (doi:10.5194/egusphere-2023-1522), 2023-07-19
Supplement: Supplementary file 1 [file egusphere-2023-1522-supplement.pdf]

## Graphical Abstract

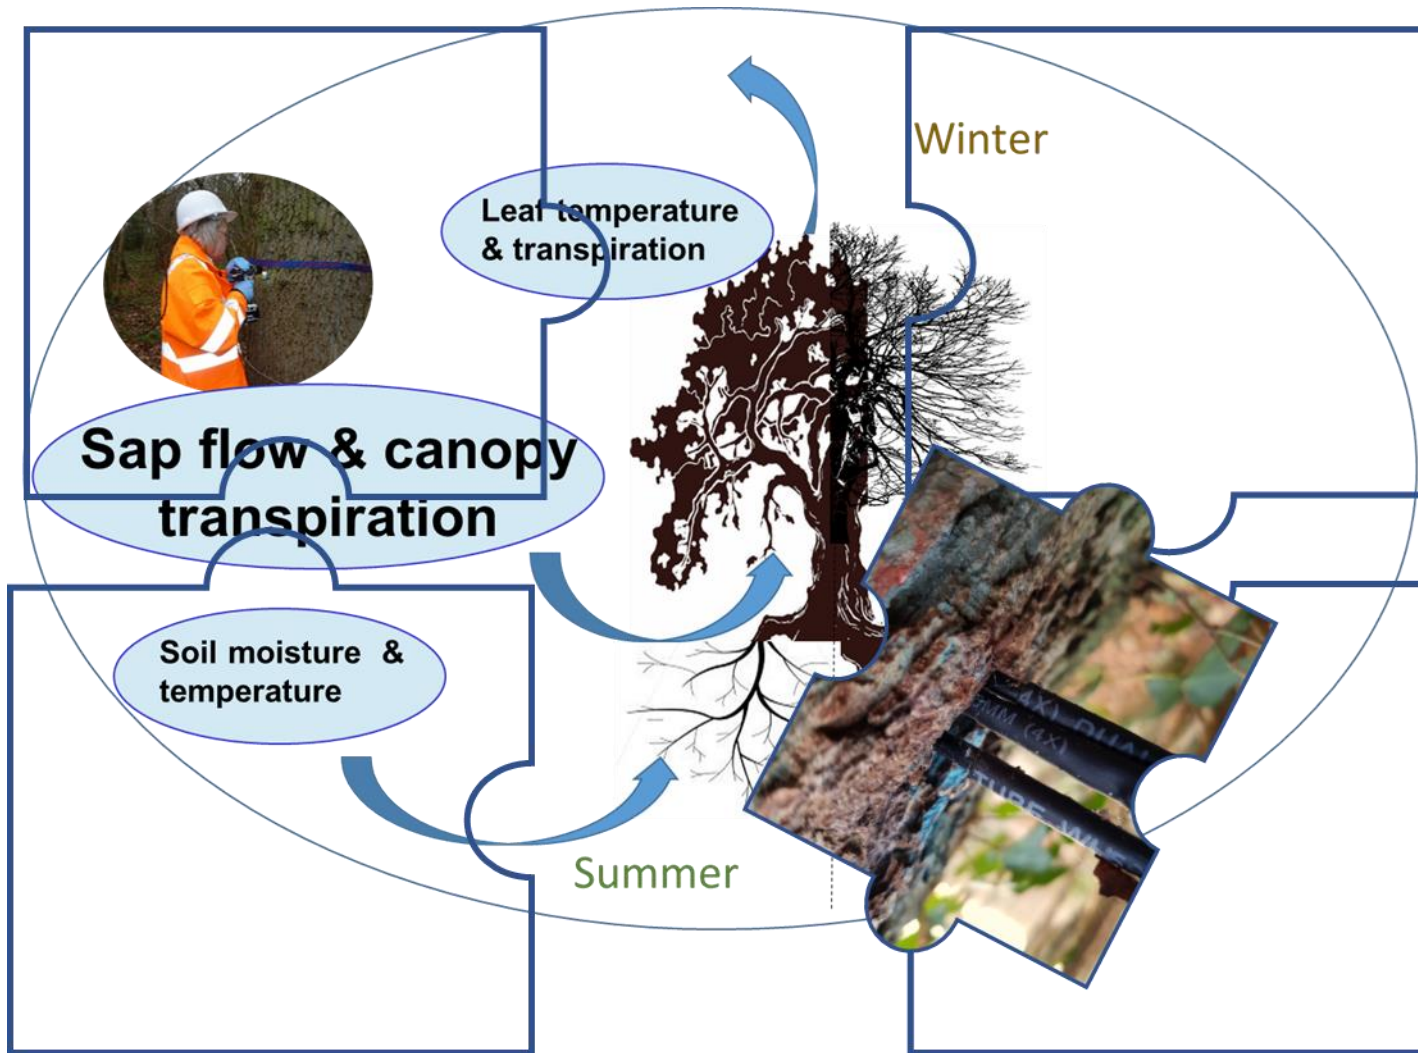

Supplementary information for:

# Water usage of old growth oak at elevated CO<sub>2</sub> in the FACE of climate change.

5 Susan Quick<sup>1,2</sup>, Giulio Curioni<sup>1,2</sup>, Stefan Krause<sup>1,2</sup>, A. Robert MacKenzie<sup>1,2</sup>

<sup>1</sup>School of Geography, Earth and Environmental Sciences, University of Birmingham, Birmingham, B15 2TT, UK

<sup>2</sup>Birmingham Institute of Forest Research, University of Birmingham, Birmingham, B15 2TT, UK

<sup>3</sup>Laboratoire d'écologie des hydrosystèmes naturels et anthropisés, University Claude Bernard, Lyon1, Lyon, France (LEHNA)

10 <sup>4</sup>Institute for Global Innovation, University of Birmingham, Birmingham, B15 2TT, UK

Correspondence to: (Susan Quick ([SEQ616@student.bham.ac.uk](mailto:SEQ616@student.bham.ac.uk)) - proofs etc. only), A. Robert MacKenzie ([A.R.Mackenzie@bham.ac.uk](mailto:A.R.Mackenzie@bham.ac.uk)) official correspondence author

## Section 2.2

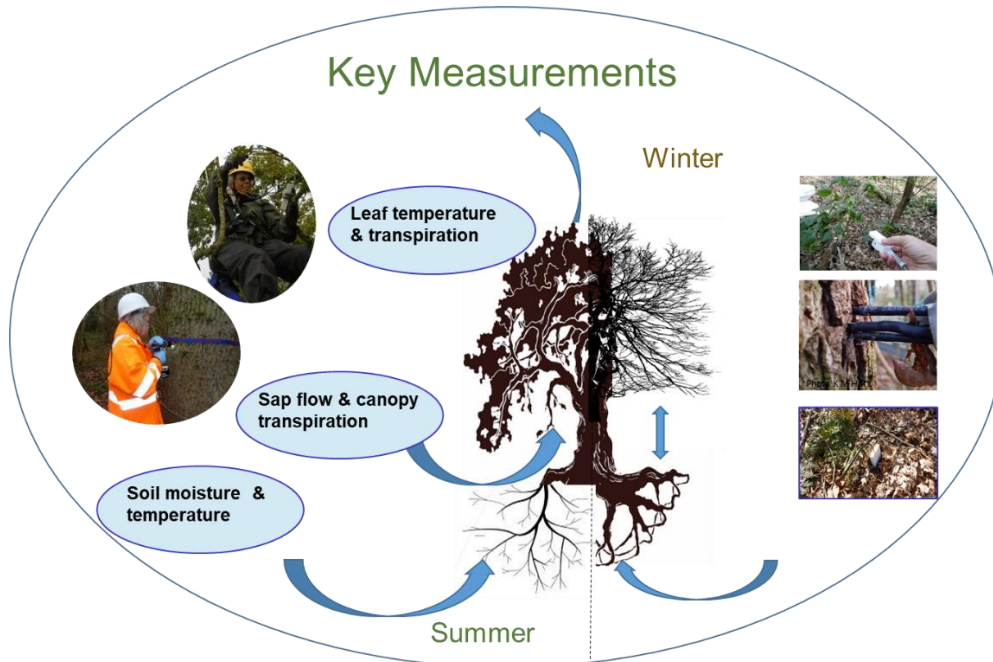

15 **Figure S1: Key plant hydraulic related measurements**

| Tree ID | Array No. | Treatment        | Install & Measure date | Initial Circumference (m) | Initial Average R <sub>b</sub> at probeset (m) | 2022 Circumference (m) | 2022 Average R <sub>b</sub> at probeset (m) | Average probeset height (m) |
|---------|-----------|------------------|------------------------|---------------------------|------------------------------------------------|------------------------|---------------------------------------------|-----------------------------|
| 8467    | 1         | eCO <sub>2</sub> | 13/07/2017             | 1.640                     | <u>0.261</u>                                   | 1.656                  | <u>0.264</u>                                | 1.13                        |
| 8468    | 1         | eCO <sub>2</sub> | 13/07/2017             | 1.720                     | 0.274                                          | 1.734                  | 0.276                                       | 1.2                         |
| 8673    | 2         | aCO <sub>2</sub> | 28/08/2018             | 2.360                     | 0.376                                          | 2.372                  | 0.378                                       | 1.26                        |
| 8749    | 2         | aCO <sub>2</sub> | 28/08/2018             | 2.600                     | 0.414                                          | 2.636                  | 0.420                                       | 1.2                         |
| 8351    | 3         | aCO <sub>2</sub> | 20/07/2017             | 1.710                     | 0.272                                          | 1.726                  | 0.275                                       | 1.19                        |
| 9301    | 3         | aCO <sub>2</sub> | 20/07/2017             | 2.560                     | 0.407                                          | 2.621                  | 0.417                                       | 1.13                        |
| 6621    | 4         | eCO <sub>2</sub> | 28/08/2018             | 2.350                     | 0.374                                          | 2.372                  | 0.378                                       | 1.3                         |
| 6632    | 4         | eCO <sub>2</sub> | 05/09/2018             | 2.270                     | 0.361                                          | 2.288                  | 0.364                                       | 1.28                        |
| 6382    | 5         | aCO <sub>2</sub> | 18/07/2018             | 2.210                     | 0.352                                          | 2.220                  | 0.353                                       | 1.3                         |
| 6406    | 5         | aCO <sub>2</sub> | 18/07/2018             | 2.890                     | 0.460                                          | 2.864                  | 0.456                                       | 1.28                        |
| 3755    | 6         | eCO <sub>2</sub> | 17/07/2018             | 2.260                     | 0.360                                          | 2.278                  | 0.363                                       | 1.23                        |
| 5846    | 6         | eCO <sub>2</sub> | 17/07/2018             | 2.920                     | 0.465*                                         | 2.968                  | 0.472*                                      | 1.3                         |
| 6027    | 7         | none/ ghost      | 21/07/2017             | 2.050                     | 0.326                                          | 2.104                  | 0.335                                       | 1.29                        |
| 6021    | 7         | none/ ghost      | 21/07/2017             | 2.620                     | 0.417                                          | 2.644                  | 0.421                                       | 1.23                        |
| 3642    | 8         | none/ ghost      | 24/07/2017             | 1.720                     | 0.274                                          | 1.790                  | 0.285                                       | 1.24                        |
| 3634    | 8         | none/ ghost      | 24/07/2017             | 2.690                     | 0.428                                          | 2.718                  | 0.433                                       | 1.28                        |
| 7476    | 9         | none/ ghost      | 05/01/2017             | 2.160                     | 0.344                                          | 2.202                  | 0.350                                       | 1.3                         |
| 7331    | 9         | none/ ghost      | 05/07/2017             | 2.500                     | 0.398                                          | 2.556                  | 0.407                                       | 1.25                        |

**Table S1: Tree identification, array number, treatment type, species and installation/ measurement dates along with circumference and diameter at probeset insertion point height for target oak trees at start and in 2022. Underlined R<sub>b</sub> values are smallest (initial & 2022). Largest R<sub>b</sub> is marked with an asterix.**

Section 2.4

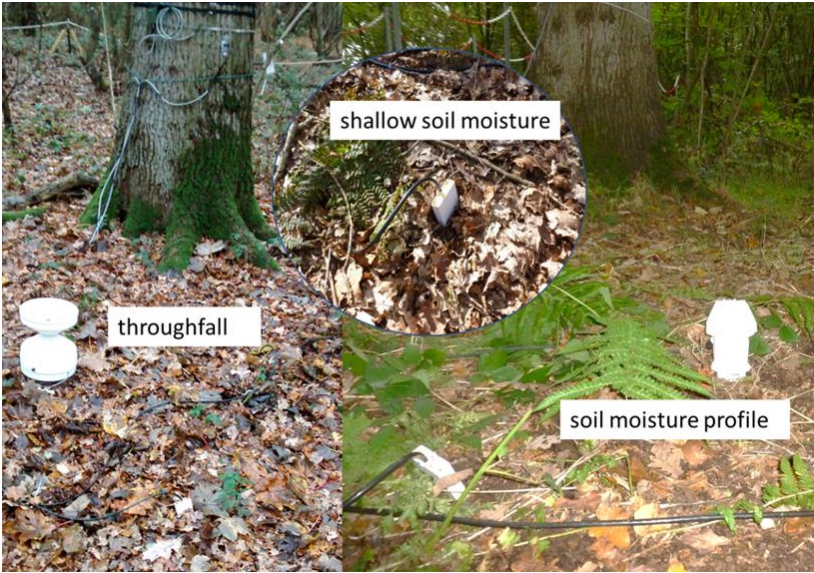

25 Figure S2: Photo of soil moisture and throughfall set-up array

## Section 2.7

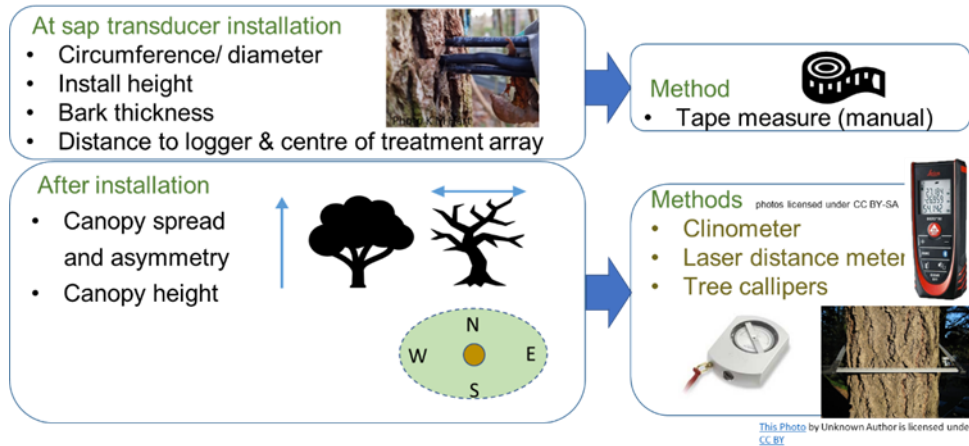

30 **Figure S3: Methods of measuring tree size including tape measure for circumference, callipers for stem diameter E-W and N-S and use of clinometer and laser distance device to identify canopy extent at the four cardinal compass points. Canopy diameter and stem diameter are combined to calculate average canopy spread diameter and approximate canopy area.**

Section 2.5

| Description                     | Make                              | Model   | Position           | Parameter                    | Parameter symbol | Where      | Units                | Sampling rate | Logger rate |
|---------------------------------|-----------------------------------|---------|--------------------|------------------------------|------------------|------------|----------------------|---------------|-------------|
| hemispherical solar radiation   | Hukseflux pyranometer             | LP02-03 | Top canopy (c25 m) | Solar Radiation (Av)         | $TG$             | A 1-6      | Watt m <sup>-2</sup> | 10 secs       | Every hour  |
| temperature sensor (thermistor) | Campbell Sci                      | T107    | Top canopy (c20 m) | Air Temp (Av)                | $T_a$            | A 1-6      | °C                   | 10 secs       | Every hour  |
| Met tower precipitation         | Texas Electronics (Dallas; Texas) | TR-525M | 2 m above ground   | Precipitation - accumulative | $P$              | Met Towers | mm                   |               | 15 minutes  |

35 Table S2: FACE and Met tower instrumentation.

**Section 2.7**

| 2022 | Tree               | GH           | Tree | aCO2         | Tree | eCO2         |
|------|--------------------|--------------|------|--------------|------|--------------|
|      | 6027               | <b>2.104</b> | 8673 | <b>2.372</b> | 8467 | <b>1.656</b> |
|      | 6021               | <b>2.644</b> | 8749 | <b>2.636</b> | 8468 | <b>1.734</b> |
|      | 3642               | <b>1.79</b>  | 8351 | <b>1.726</b> | 6621 | <b>2.372</b> |
|      | 3634               | <b>2.718</b> | 9301 | <b>2.621</b> | 6632 | <b>2.288</b> |
|      | 7476               | <b>2.202</b> | 6382 | <b>2.22</b>  | 3755 | <b>2.278</b> |
|      | 7331               | <b>2.556</b> | 6406 | <b>2.864</b> | 5846 | <b>2.968</b> |
|      | mean circumference | 2.34         |      | 2.41         |      | 2.22         |

|     |      |              |     |      |              |     |      |              |
|-----|------|--------------|-----|------|--------------|-----|------|--------------|
| sm  | 3642 | <b>1.79</b>  | sm  | 8351 | <b>1.726</b> | sm  | 8467 | <b>1.656</b> |
| med | 7476 | <b>2.202</b> | med | 8673 | <b>2.372</b> | med | 6632 | <b>2.288</b> |
| lg  | 3634 | <b>2.718</b> | lg  | 6406 | <b>2.864</b> | lg  | 5846 | <b>2.968</b> |

**Table S3: To show circumference measures in 2022 for all trees. Also mean circumference (metres) and sizes of smallest (sm), largest (lg) and medium (med) sized trees in each treatment category.**

**Section 2.8**

| Parameter                             | Author                                                    | Reported value                                                       | Conversion factor      | Metric equivalent                                                                                                                         | Tree size               |
|---------------------------------------|-----------------------------------------------------------|----------------------------------------------------------------------|------------------------|-------------------------------------------------------------------------------------------------------------------------------------------|-------------------------|
| Sap flux (density) maximum            | Tatarinov (2005)                                          | 0.1<br>kg cm <sup>-2</sup> h <sup>-1</sup>                           | 10 <sup>4</sup> / 3600 | 2.7778 x 10 <sup>-1</sup><br>Kg m <sup>-2</sup> s <sup>-1</sup><br>[ litres m <sup>-2</sup> s <sup>-1</sup> ]                             | Dbh>30cm,<br>Height=29m |
| Sapflux max hourly (mean of 2x trees) | Sanchez-Perez (2008)<br>HP                                | The hourly Maximum (total) fluxes were [30 litres h <sup>-1</sup> ]. |                        | The hourly maximum fluxes were [30 litres h <sup>-1</sup> ].<br>[July circa 380 (litres tree <sup>-1</sup> day <sup>-1</sup> )] see below | Dbh=83cm<br>Height=22   |
| Total daily sapflux (summer max)      | Čermák et al (1992) ref in Tatarinov (2005)*              | 200 kg tree <sup>-1</sup> h <sup>-1</sup>                            |                        | 200 kg tree <sup>-1</sup> h <sup>-1</sup><br>[circa 1600 (kg tree <sup>-1</sup> day <sup>-1</sup> )]                                      | Dbh=30cm<br>Height=29m  |
| Total daily sapflux mean              | Sanchez-Perez (2008)<br>HP                                |                                                                      | N/A                    | [385 +/-41 l tree <sup>-1</sup> day <sup>-1</sup> July 1996]                                                                              | Dbh=83cm<br>Height=22   |
| Total daily sapflux max *Q.suber      | David (2013)                                              | 250 (kg tree <sup>-1</sup> day <sup>-1</sup> )                       |                        | 250 (kg tree <sup>-1</sup> day <sup>-1</sup> )                                                                                            |                         |
| Breast height Sap flux area (typical) | (Čermák et al (1992) & as quoted/Implied Tatarinov (2005) | 2000 cm +2                                                           | 10 <sup>-4</sup>       | 2.0 x 10 <sup>-1</sup> (m +2)                                                                                                             |                         |

**Table S4: Comparison of sap parameters with other studies of oak.**



Section 3.1

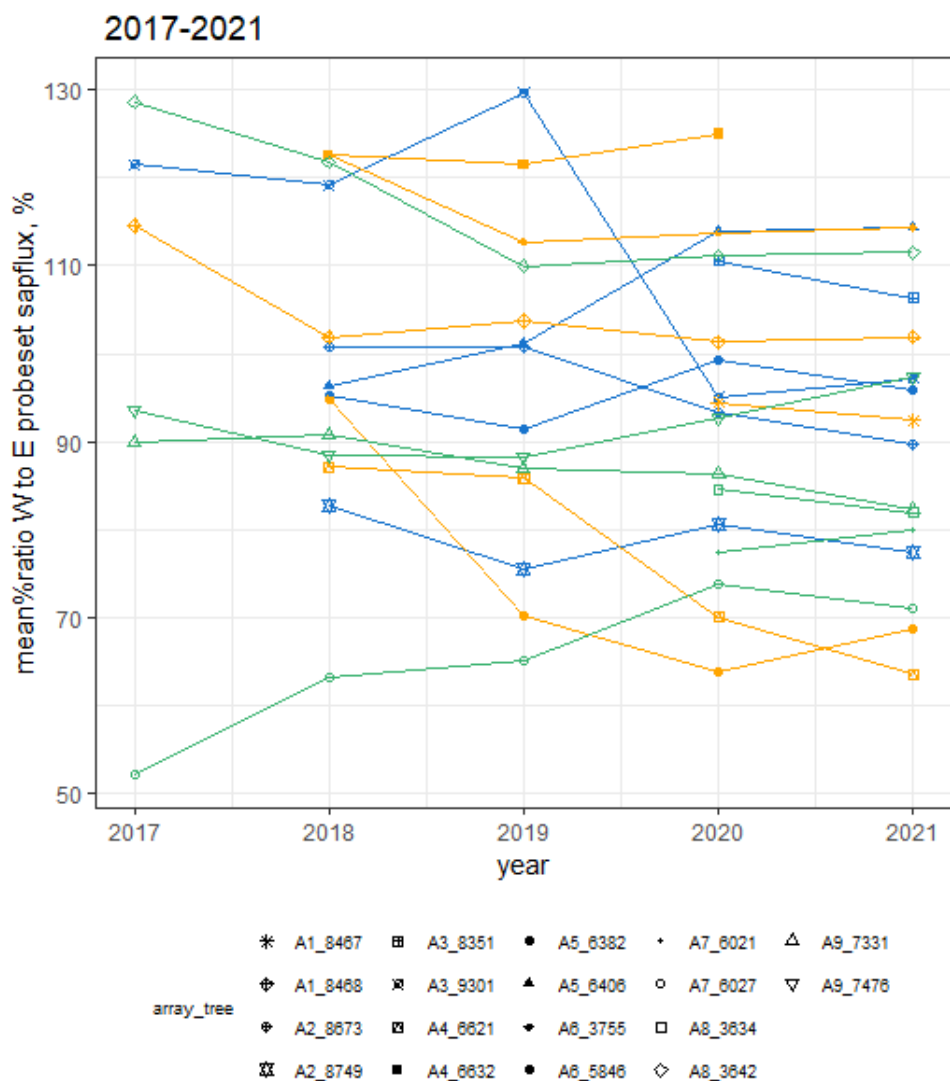

45

Figure S4: Imbalance of median sap flux values for each probeset by tree. Tree sapflux data for W- facing probeset as a percentage of E-facing sapflux data, averaged for each year of two probeset operation. Points are derived from means of monthly median probeset sapflux values for each tree. Note 2017 is only a partial year.

(a)

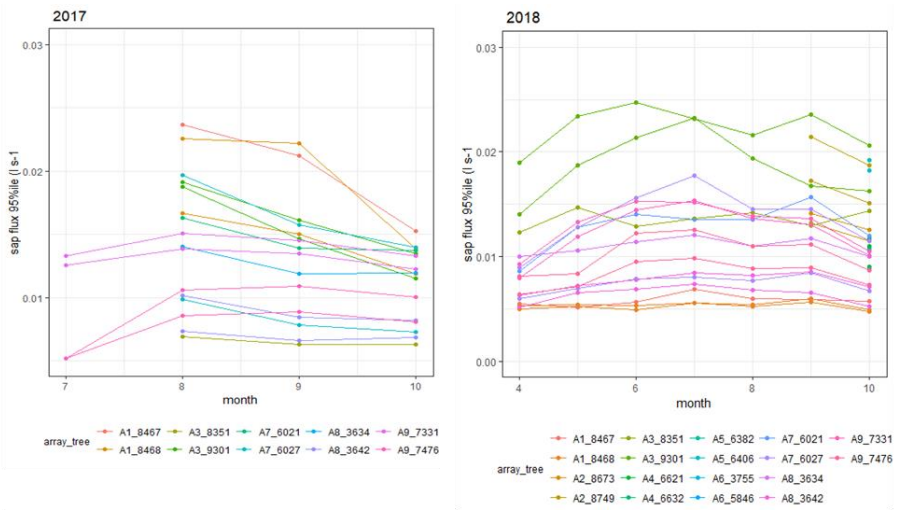

(b)

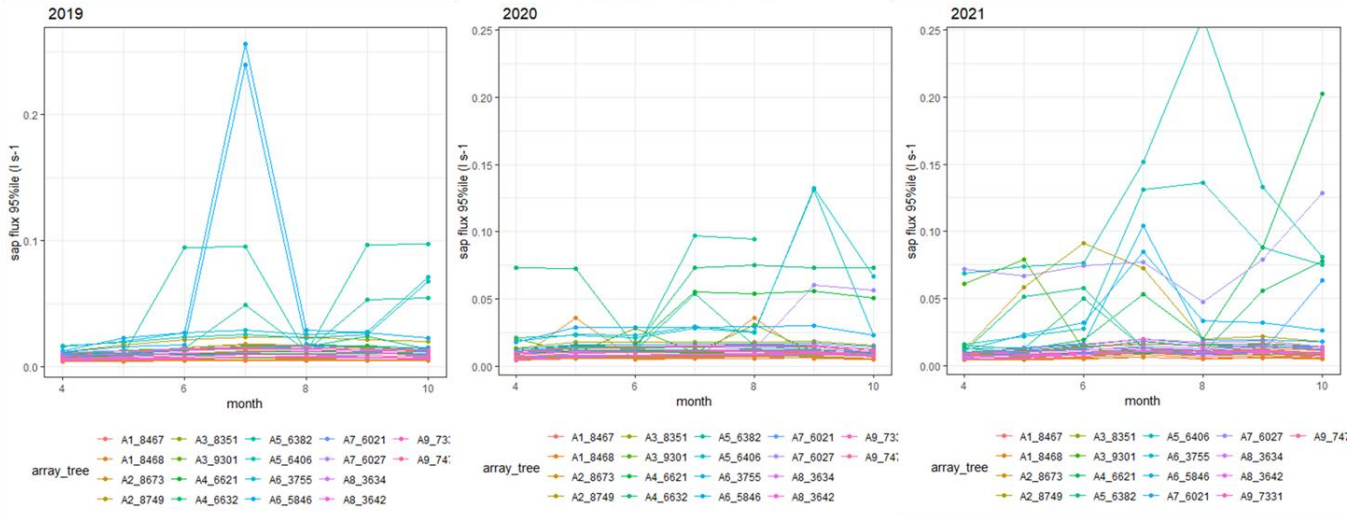

Figure S5: In years 2017 to 2021, summary monthly treatment season 95%ile sap flux ( $l s^{-1}$ ) for each functional probeset all trees are shown. Colours represent individual trees and are also labelled with Array number. A1,A4, A6 are  $eCO_2$  trees, A3,A2, A5 are  $aCO_2$  trees, A7,A8, A9 are *ghost* trees. (a) years 2017 and 2018, scaled to show a maximum of  $0.03 l s^{-1}$ . (b) years 2019, 2020 and 2021, scaled to show a maximum of  $0.25 l s^{-1}$ .

Section 3.2

60

|              | <b>slope</b>                    | <b>SE</b>   | <b>intercept</b> | <b>t</b>     | <b>df</b> | <b>p</b> |
|--------------|---------------------------------|-------------|------------------|--------------|-----------|----------|
|              | (litres per day per millimetre) |             | (litres)         |              |           |          |
| <b>aCO2</b>  | 3.86                            | <b>1.25</b> | <b>-775</b>      | <b>3.09</b>  | 16        | P<0.01   |
| <b>eCO2</b>  | 3.55                            | <b>0.31</b> | <b>-691</b>      | <b>11.53</b> | 15        | p<0.001  |
| <b>ghost</b> | 1.20                            | <b>0.47</b> | <b>75.4</b>      | <b>2.54</b>  | 21        | P<0.05   |

**Table S5: Linear regression model parameters for oak mean TWU across a month (here July) versus bark radius (m) at insertion point. In this table slope, litres per day per millimetre bark radius, is calculated. Data from 2, 6, 12, 18 or 17 trees for years 2017, 2018, 2019, 2020 & 2021 which each have two probesets (E and W facing) fully operational across the month of interest are modelled by treatment for all years combined. July typically exhibits maximum mean TWU across summer months in control arrays.**

65

| Tree_ID | Array | year | SprdAvdia | TotSpread_dia | CanopyArea | treatment | barkradius | FirstLast |
|---------|-------|------|-----------|---------------|------------|-----------|------------|-----------|
| 8467    | 1     | 2017 | 9.695     | 10.217        | 81.986     | eCO2      | 0.26       | First     |
| 8467    | 1     | 2022 | 8.377     | 8.904         | 62.264     | eCO2      | 0.26       | Last      |
| 8468    | 1     | 2017 | 9.545     | 10.092        | 79.999     | eCO2      | 0.27       | First     |
| 8468    | 1     | 2022 | 8.92      | 9.472         | 70.464     | eCO2      | 0.28       | Last      |
| 8673    | 2     | 2017 | 15.175    | 15.926        | 199.212    | aCO2      | 0.38       | First     |
| 8673    | 2     | 2022 | 11.448    | 12.203        | 116.963    | aCO2      | 0.38       | Last      |
| 8749    | 2     | 2017 | 12.48     | 13.308        | 139.088    | aCO2      | 0.41       | First     |
| 8749    | 2     | 2022 | 12.947    | 13.786        | 149.262    | aCO2      | 0.42       | Last      |
| 8351    | 3     | 2017 | 13.925    | 14.469        | 164.432    | aCO2      | 0.27       | First     |
| 8351    | 3     | 2022 | 12.398    | 12.948        | 131.667    | aCO2      | 0.28       | Last      |
| 9301    | 3     | 2017 | 16.375    | 17.19         | 232.079    | aCO2      | 0.41       | First     |
| 9301    | 3     | 2022 | 16.083    | 16.918        | 224.786    | aCO2      | 0.42       | Last      |
| 6621    | 4     | 2017 | 11.155    | 11.903        | 111.277    | eCO2      | 0.37       | First     |
| 6621    | 4     | 2022 | 14.598    | 15.353        | 185.139    | eCO2      | 0.38       | Last      |
| 6632    | 4     | 2018 | 11.49     | 12.213        | 117.14     | eCO2      | 0.36       | First     |
| 6632    | 4     | 2022 | 11.248    | 11.977        | 112.657    | eCO2      | 0.36       | Last      |
| 6382    | 5     | 2017 | 15.03     | 15.733        | 194.419    | aCO2      | 0.35       | First     |
| 6382    | 5     | 2022 | 12.573    | 13.28         | 138.511    | aCO2      | 0.35       | Last      |
| 6406    | 5     | 2017 | 15.795    | 16.715        | 219.431    | aCO2      | 0.46       | First     |
| 6406    | 5     | 2022 | 16.747    | 17.658        | 244.9      | aCO2      | 0.46       | Last      |
| 3755    | 6     | 2017 | 11.74     | 12.459        | 121.922    | eCO2      | 0.36       | First     |
| 3755    | 6     | 2022 | 11.232    | 11.957        | 112.284    | eCO2      | 0.36       | Last      |

| Tree_ID | Array | year | SprdAvdia | TotSpread_dia | CanopyArea | treatment | barkradius | FirstLast |
|---------|-------|------|-----------|---------------|------------|-----------|------------|-----------|
| 5846    | 6     | 2017 | 15.315    | 16.244        | 207.253    | eCO2      | 0.46       | First     |
| 5846    | 6     | 2022 | 16.083    | 17.028        | 227.73     | eCO2      | 0.47       | Last      |
| 6021    | 7     | 2017 | 13.3      | 14.134        | 156.898    | ghost     | 0.42       | First     |
| 6021    | 7     | 2022 | 14.635    | 15.477        | 188.123    | ghost     | 0.42       | Last      |
| 6027    | 7     | 2017 | 14.42     | 15.073        | 178.428    | ghost     | 0.33       | First     |
| 6027    | 7     | 2022 | 11.568    | 12.238        | 117.629    | ghost     | 0.33       | Last      |
| 3634    | 8     | 2017 | 13.195    | 14.051        | 155.067    | ghost     | 0.43       | First     |
| 3634    | 8     | 2022 | 11.39     | 12.255        | 117.949    | ghost     | 0.43       | Last      |
| 3642    | 8     | 2017 | 10.675    | 11.222        | 98.916     | ghost     | 0.27       | First     |
| 3642    | 8     | 2022 | 9.802     | 10.371        | 84.483     | ghost     | 0.28       | Last      |
| 7331    | 9     | 2017 | 16.875    | 17.671        | 245.246    | ghost     | 0.40       | First     |
| 7331    | 9     | 2022 | 16.785    | 17.599        | 243.246    | ghost     | 0.41       | Last      |
| 7476    | 9     | 2017 | 9.685     | 10.373        | 84.501     | ghost     | 0.34       | First     |
| 7476    | 9     | 2022 | 10.967    | 11.668        | 106.918    | ghost     | 0.35       | Last      |

**Table S6: Table of canopy spread v. bark radius and canopy spread diameter data for oak. Two separate repeat measures (First at installation year, Last early 2022) are listed. Bark radius is for the year of measurement.**

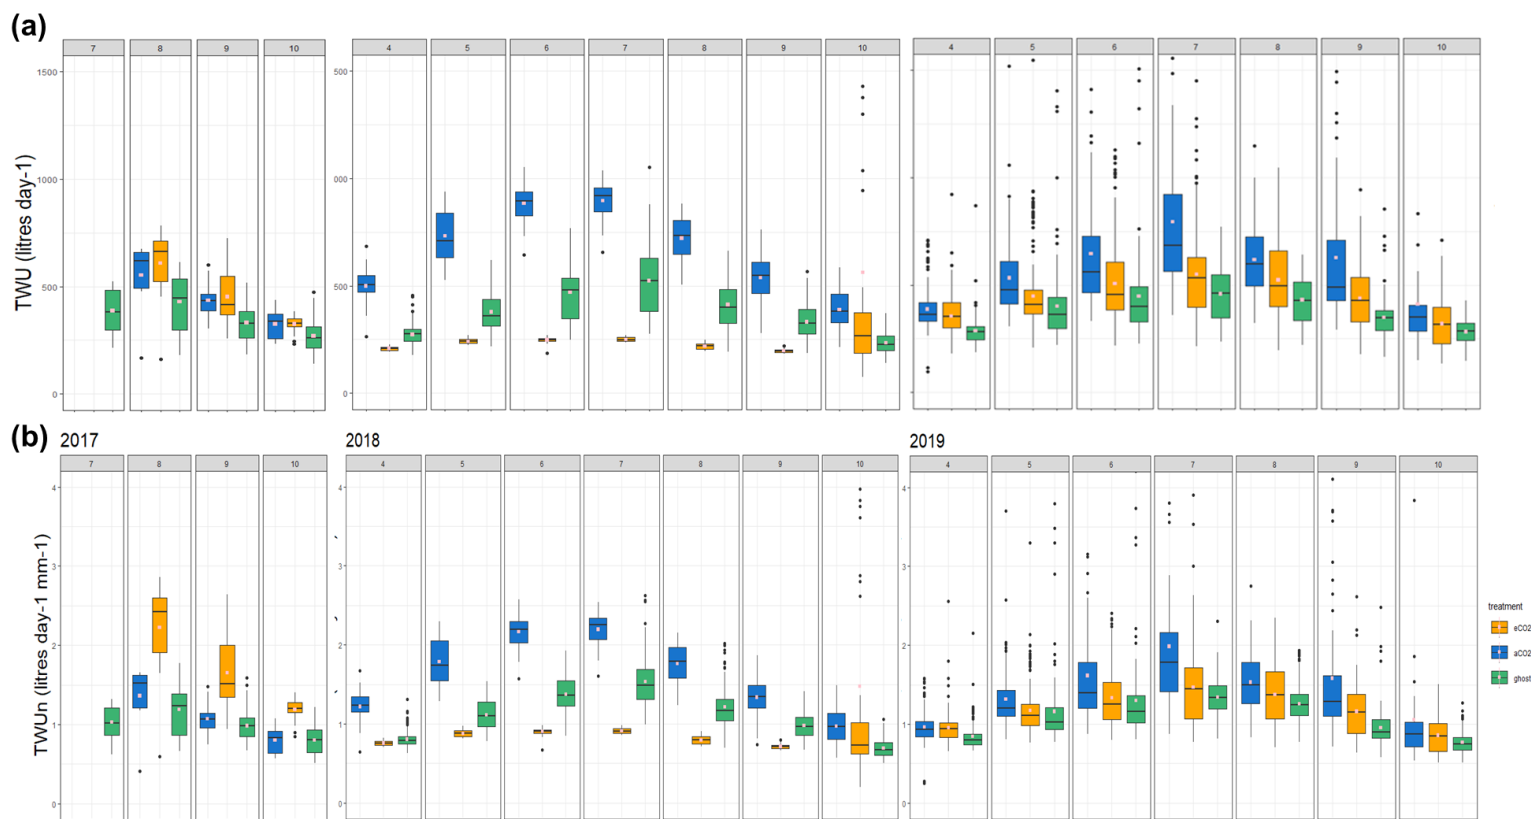

70

Figure S6: (a) Ghost and Infrastructure TWU(litres d-1) boxplots years 2017-2019. Boxplots 2018, 2019, show mean daylight daily tree water usage (TWU in litres day<sup>-1</sup>) combined by treatment for each treatment month April to October. (b) TWUn (litres d-1 mm<sup>-1</sup>), i.e. TWU normalised by tree radius (mm) at stem probe insertion height. Numbers of trees with both sap probeset installations functioning differs by month and year from July 2017 (2 trees) until Oct 2019 (18 trees). Mean values, calculated from the entire range of data, are shown as spots (pink).

75

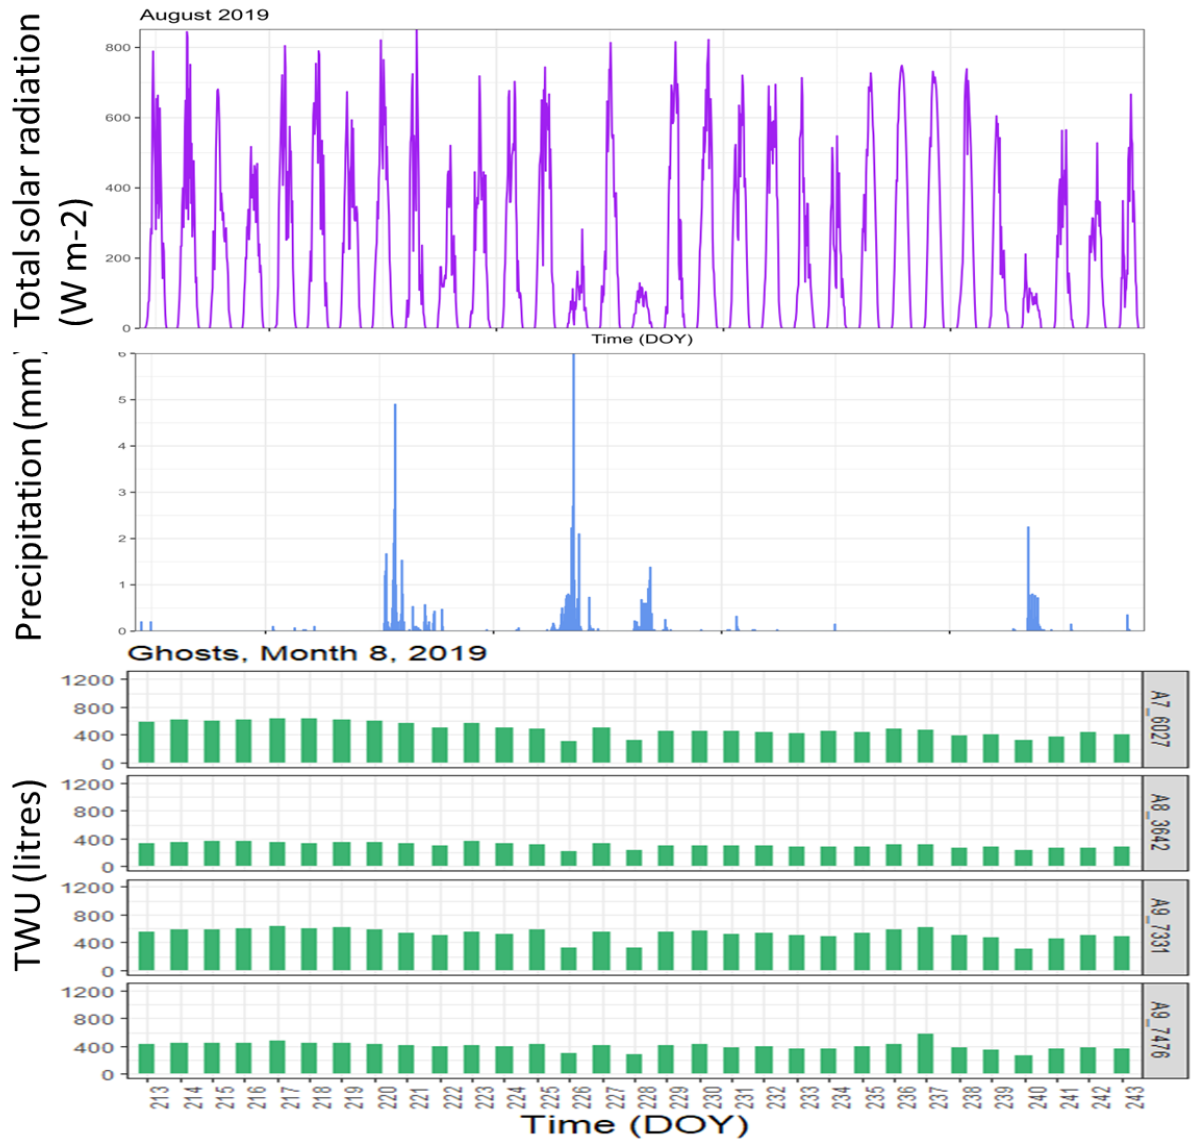

Figure S7: Example TWU (litres) per DOY v. solar radiation and precipitation for August 2019. Note if precipitation is nocturnal, then it does not influence TWU directly.

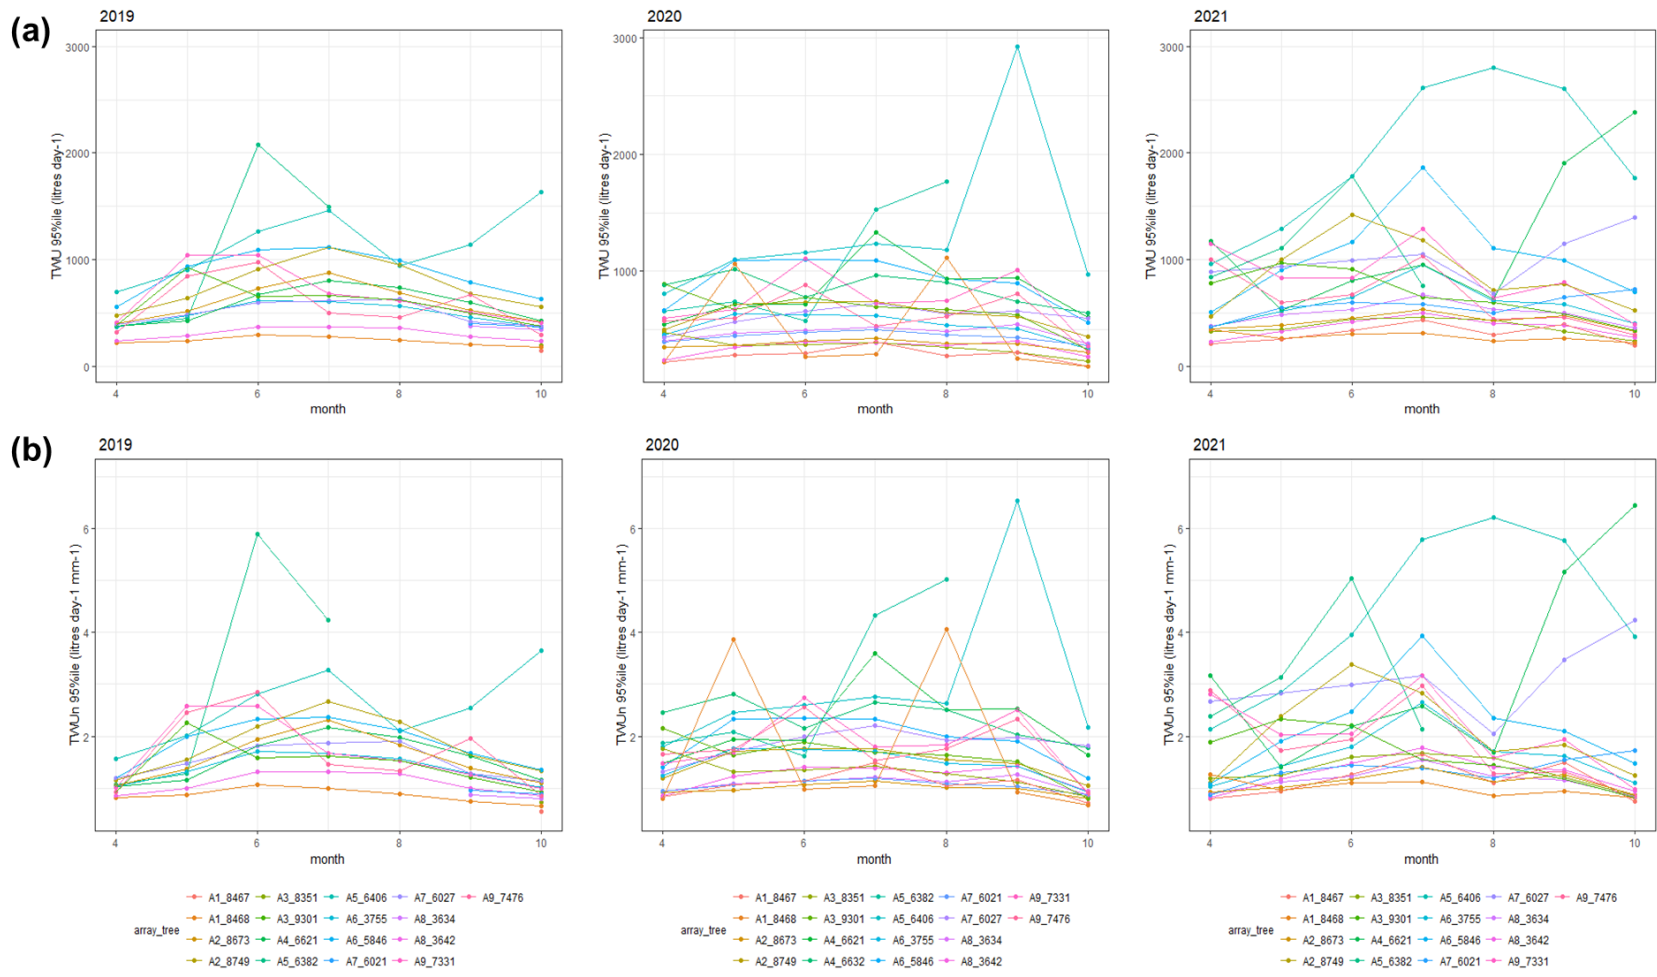

Figure S8: Comparison of monthly water usage data for all trees, (a) TWU and (b) TWUn 95%iles, across seasons 3 to 5 of treatment (2019–2022). Colours correspond to individual trees.



### Section 3.3

Annual mean solar radiation and air temp from FACE monitoring (top of 6 infrastructure arrays)  
2017 – 2018                      2019-2020                      2021-

Extracted from 30min FACE  
data files.  
Jan 2022 & Jun 2022

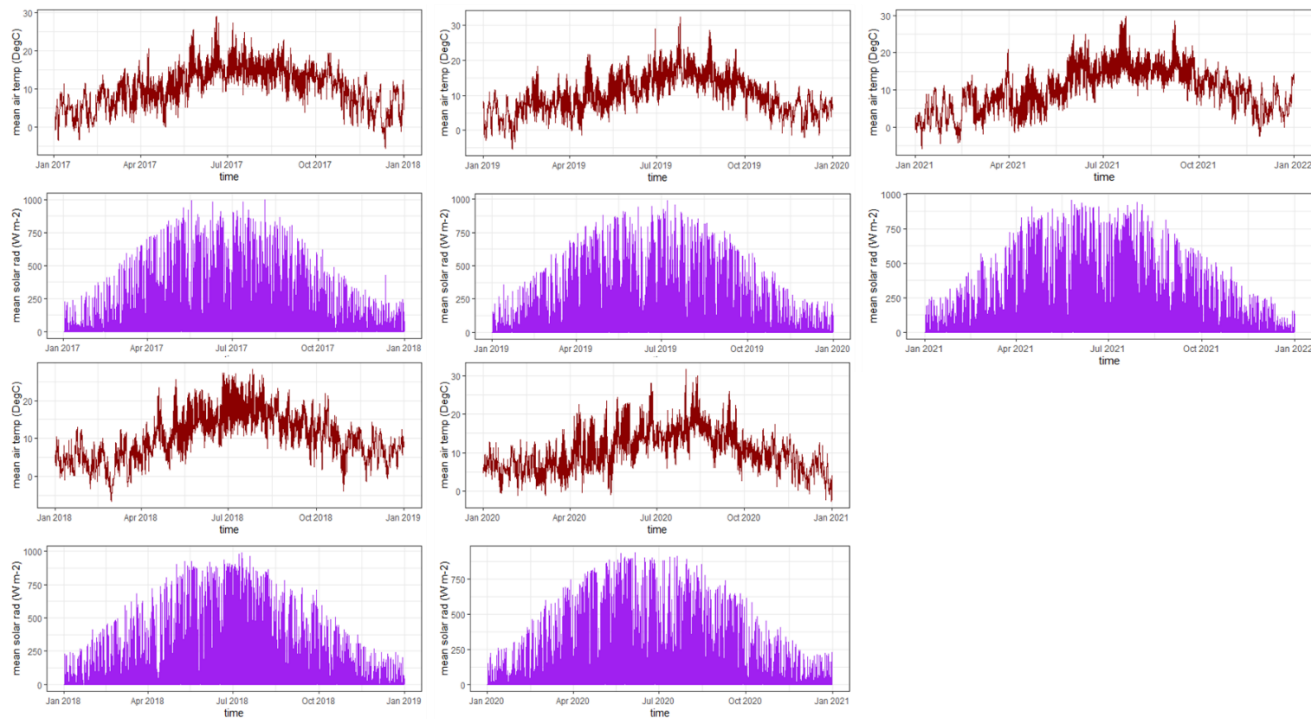

90 **Figure S9: Annual mean solar radiation (W m-2) and air temp (degrees C) for 2017 to 2021 from FACE monitoring (top of six infrastructure arrays).**

95
